# Supplementary material for: A core–shell structured polyplex for efficient and non-toxic gene delivery
Source: Royal Society of Chemistry journal article supplement (doi:10.1039/c7tb00690j), 2017-01-01
Supplement: c7tb00690j1.pdf [file c7tb00690j1.pdf]

## Supporting information

# A Core-Shell Structured Polyplex for Efficient and Non-toxic Gene Delivery

Saisai Wang<sup>a,†</sup>, Fei Wang<sup>b,†</sup>, Qiang Zhang<sup>a,\*</sup>, Yiyun Cheng<sup>a,\*</sup>

<sup>a</sup> Shanghai Key Laboratory of Regulatory Biology, School of Life Sciences, East China Normal University, Shanghai, P.R. China

<sup>b</sup> Shanghai Institute of Traumatology and Orthopaedics, Shanghai Key Laboratory for Prevention and Treatment of Bone and Joint Diseases with Integrated Chinese-Western Medicine, Ruijin Hospital, Jiao Tong University School of Medicine, Shanghai 200025, China.

<sup>†</sup> These authors contributed equally on this manuscript.

\*Email - [yycheng@mail.ustc.edu.cn](mailto:yycheng@mail.ustc.edu.cn)

**Keywords:** dendrimer, polymer, polyethylenimine, gene delivery, core-shell polyplex

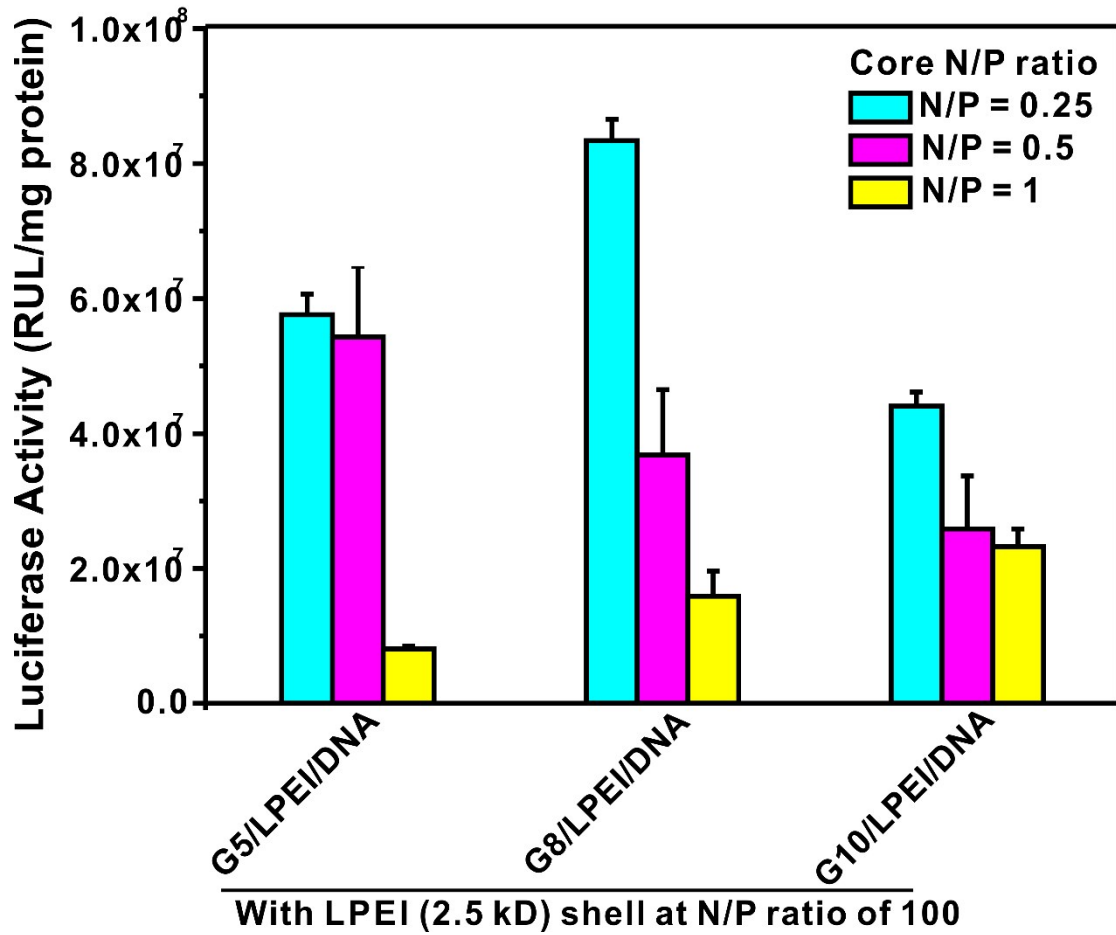

**Figure S1.** Transfection efficacies of core-shell structured polyplexes with different core polymers (G5, G8, and 10 PAMAM dendrimers) and a LPEI shell (2.5 kD). The core N/P ratios were 0.25, 0.5 and 1, respectively, and the shell N/P ratio was kept constant at 100.

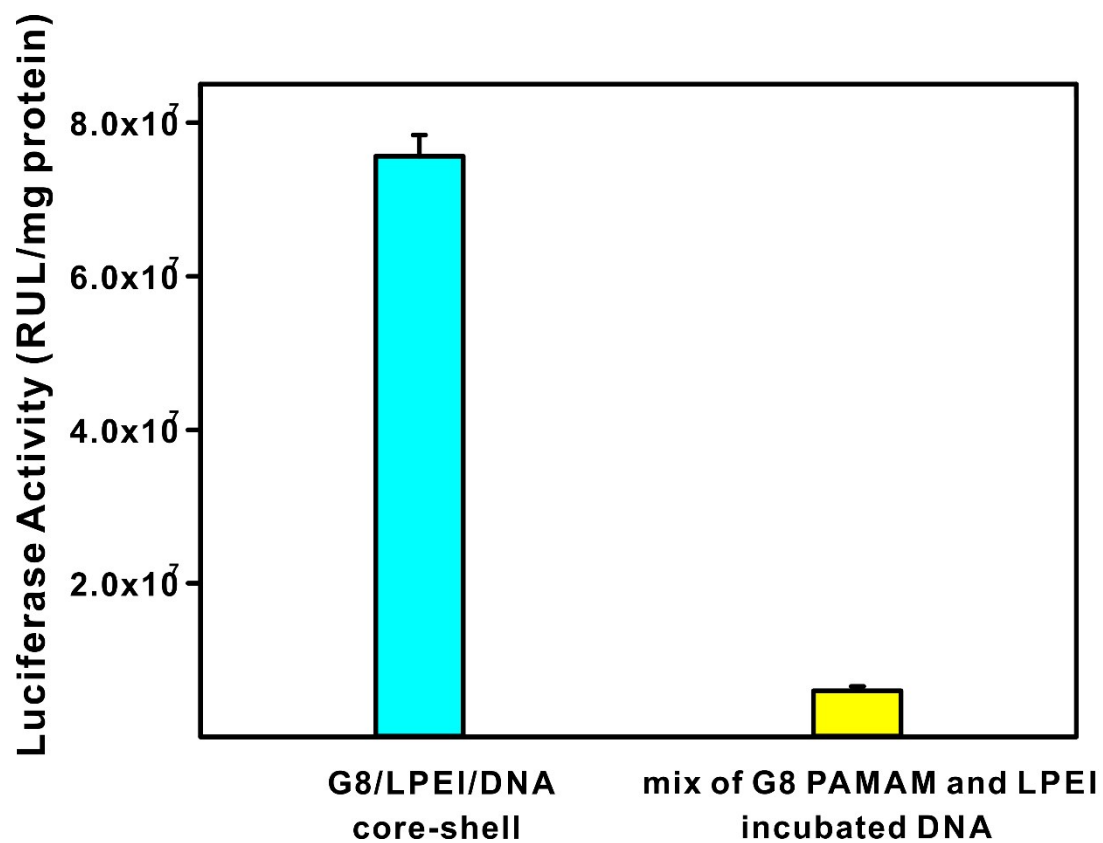

**Figure S2.** Transfection efficacies of G8/LPEI/DNA polyplex and the polyplex made of the mix of G8 PAMAM dendrimer and LPEI followed by incubation with DNA.

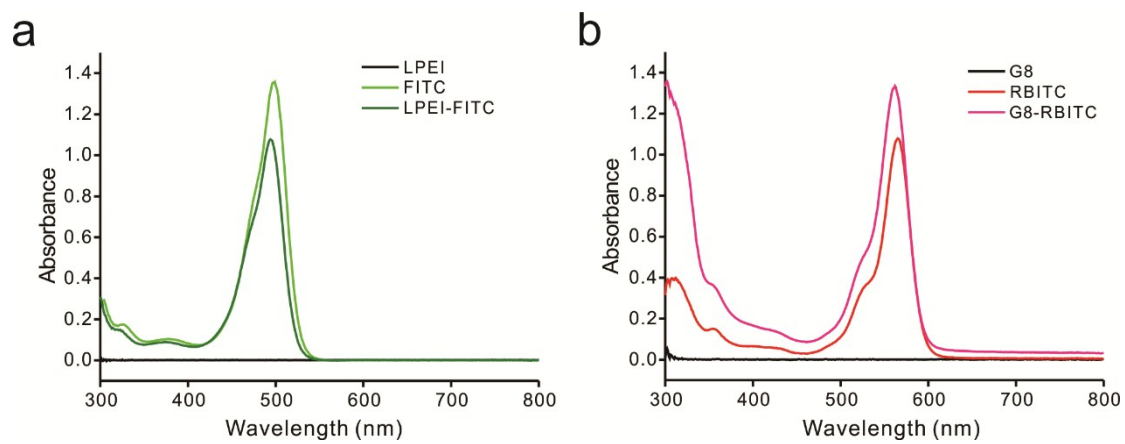

**Figure S3.** The UV-vis spectra of LPEI, FITC and LPEI-FITC conjugate (a) and G8 PAMAM dendrimer, RBITC and G8-RBITC conjugate (b).
